# Supplementary material for: One-dimensional assembly of polymeric ionic liquid capped gold nanoparticles driven by electrostatic dipole interaction
Source: Royal Society of Chemistry journal article supplement (doi:10.1039/c4ra14625e), 2014-12-09
Supplement: c4ra14625e1.pdf [file c4ra14625e1.pdf]

*Supplementary Information for RSC Advances*

**One-Dimensional Assembly of Polymeric Ionic Liquid Capped  
Gold Nanoparticles Driven by Electrostatic Dipole Interaction**

Junbo Li · Shijie Zhang · Liang Ju · Wenlan Wu · Jinwu Guo · Huiyun Zhou

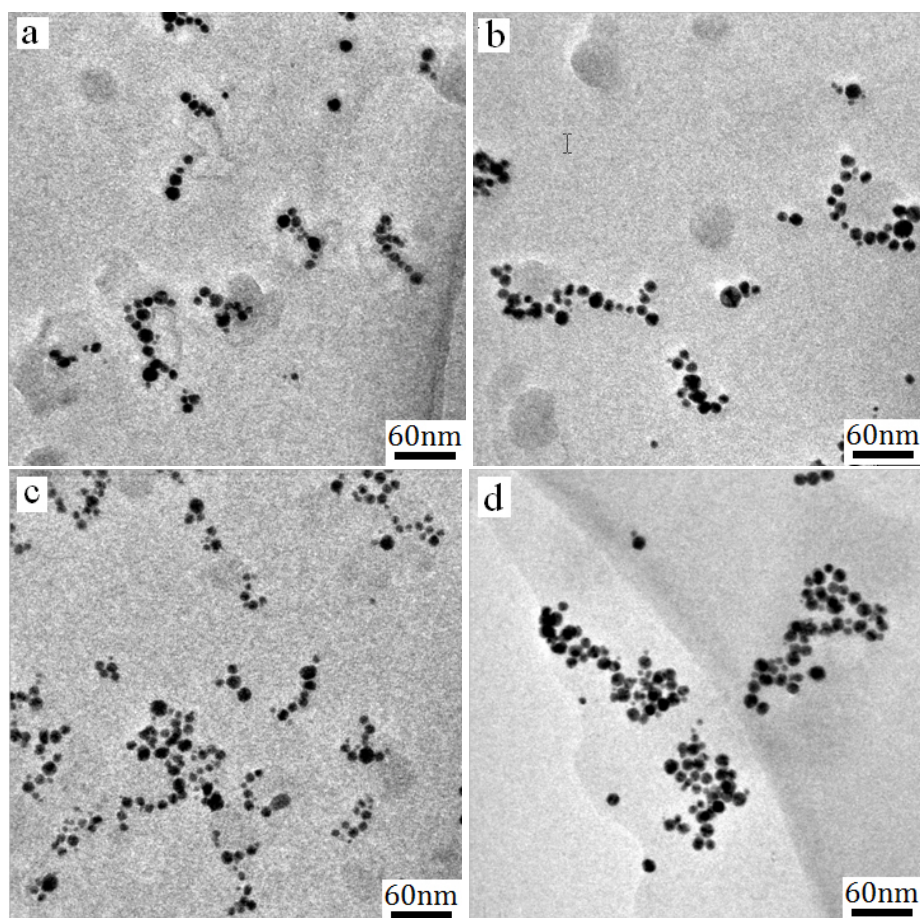

Fig. 1s. TEM images of Au nanoparticle chains obtained by 1/4(a), 1/2(b), 3/4(c) and 5/4(d) of the initial concentration of PMMPImB-@-Au NPs.

---

\* Corresponding authors at: College of Chemical Engineering & Pharmaceutics, Henan University of Science & Technology, Luo Yang, China, 471023.

*E-mail addresses:* [Lijunbo@haust.edu.cn](mailto:Lijunbo@haust.edu.cn) (J.B. Li);

Tel: +86-379-64231914; Fax: +86-379-64232193.

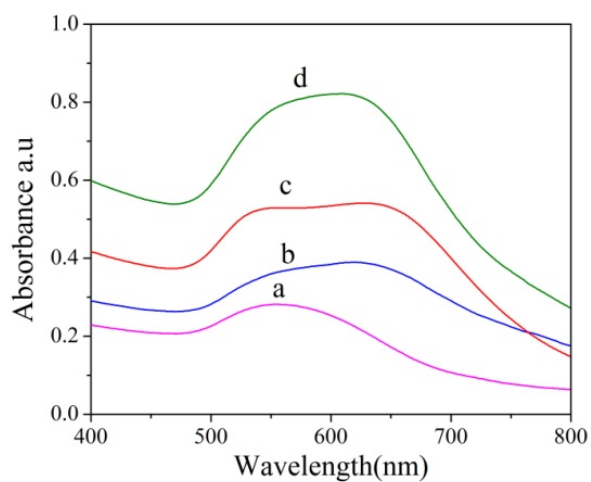

Fig. 2. UV-vis spectra of Au nanoparticle chains obtained by 1/4(a), 1/2(b), 3/4(c) and 5/4(d) of the initial concentration of PMMPlmB-@-Au NPs.

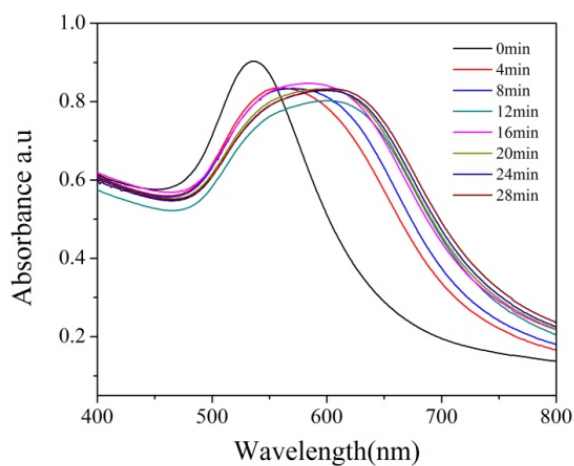

Fig. 3s. Time-dependent UV-vis spectra of 5/4 of the initial concentration of PMMPlmB-@-Au NPs at various times after addition of  $\text{HPO}_4^{2-}$ .
